# Supplementary material for: Photocatalytic methane oxidation over a TiO2/SiNWs p–n junction catalyst at room temperature
Source: publisher site journal article supplement (doi:10.3762/bjnano.15.92), 2024-09-02
Supplement: Additional file 1 [file 2190-4286-15-92-S1.pdf]

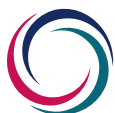

## Supporting Information

for

### Photocatalytic methane oxidation over a TiO<sub>2</sub>/SiNWs p–n junction catalyst at room temperature

Qui Thanh Hoai Ta, Luan Minh Nguyen, Ngoc Hoi Nguyen, Phan Khanh Thinh Nguyen and Dai Hai Nguyen

*Beilstein J. Nanotechnol.* **2024**, *15*, 1132–1141. doi:10.3762/bjnano.15.92

## Additional figures

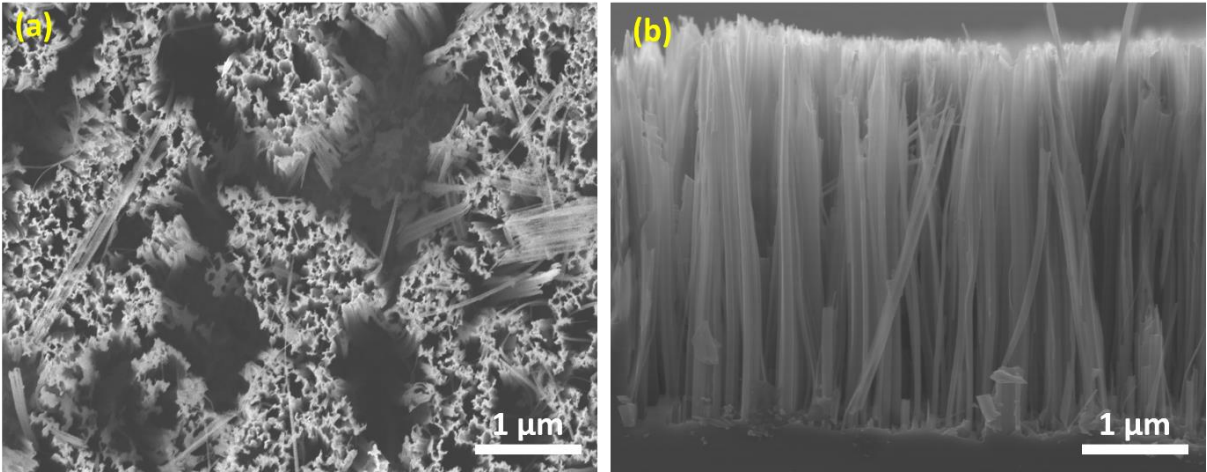

**Figure S1:** SEM images of SiNWs after etching under top view (a) and cross-sectional view (b).

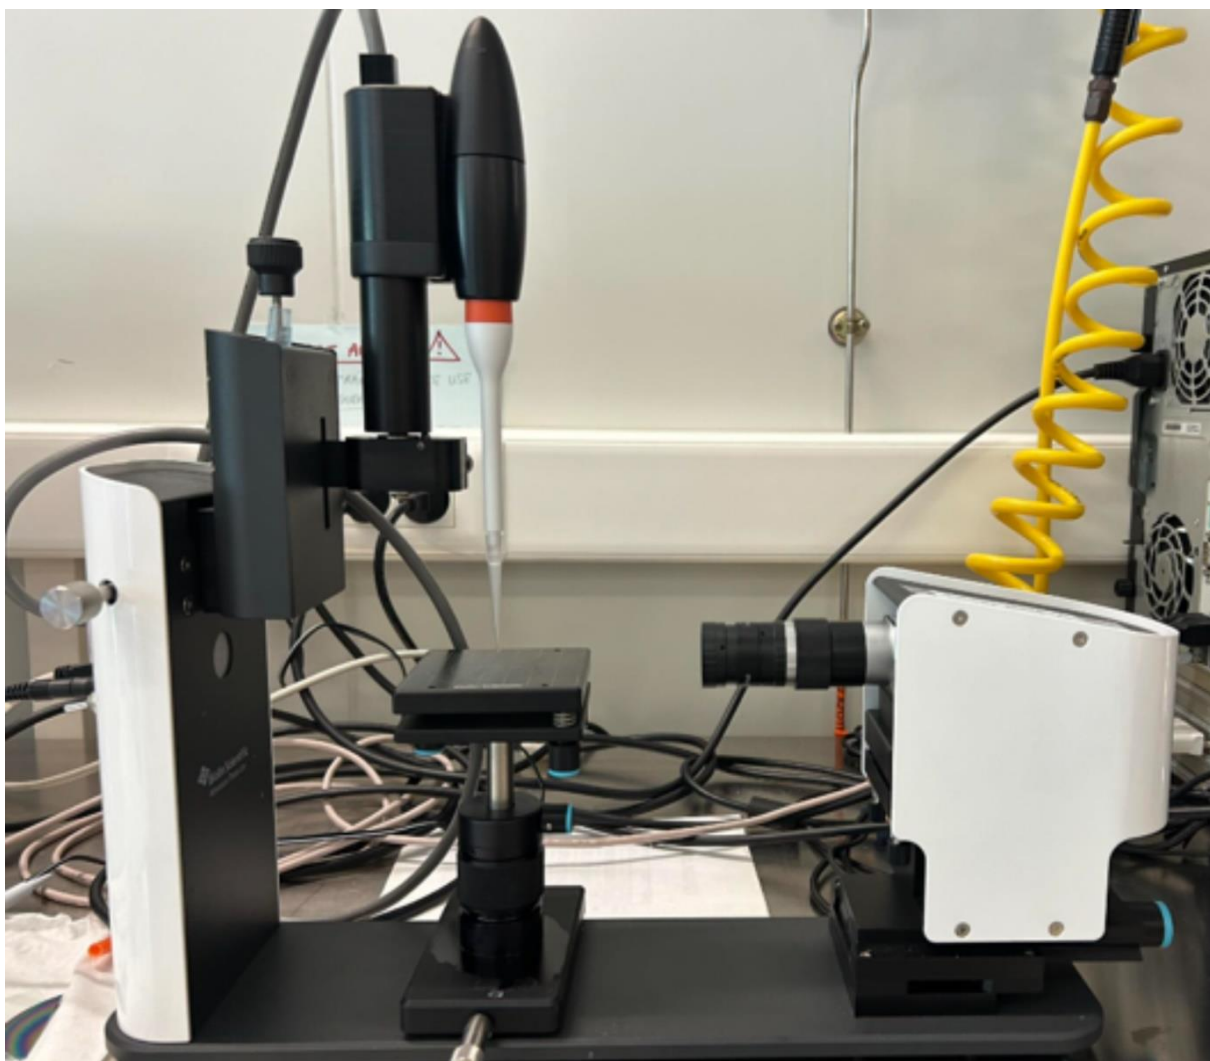

**Figure S2:** Contact angles measurement set up (Biosin Scientific). The thin film samples were placed on specimen substrate and the sample-water droplet interaction was recorded by an optical camera.

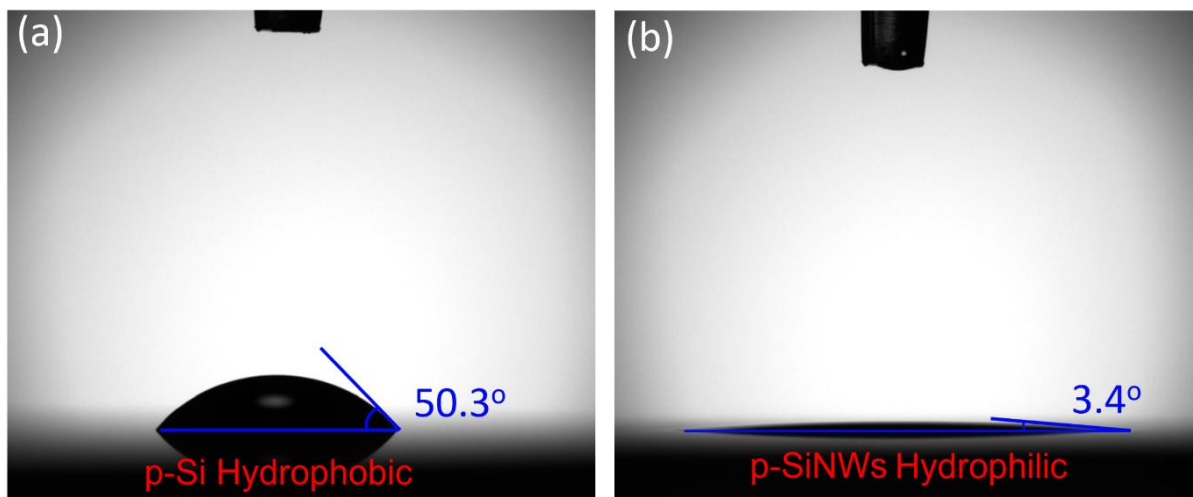

**Figure S3:** Contact angles of (a) p-Si and (b) p-SiNWs samples.
